# Supplementary material
Source: publisher figshare collection journal article supplement (https://aacr.figshare.com/articles/dataset/_/22820374)

# Supplementary Figure 10

**A** Agilent-4502A-BGN  
Histology: GBM; Subtype: All; Cutoff: median

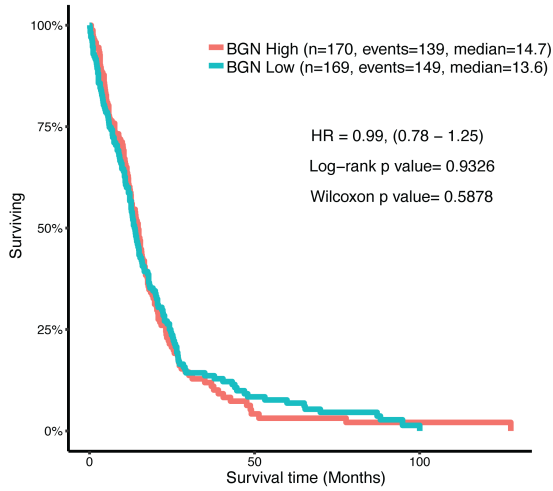

**B** RNA-Seq-BGN  
Histology: GBM; Subtype: All; Cutoff: median

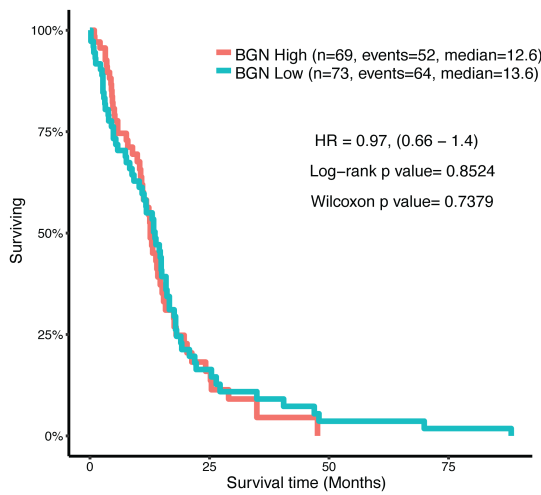

**C** Agilent-4502A-LRP6  
Histology: GBM; Subtype: All; Cutoff: median

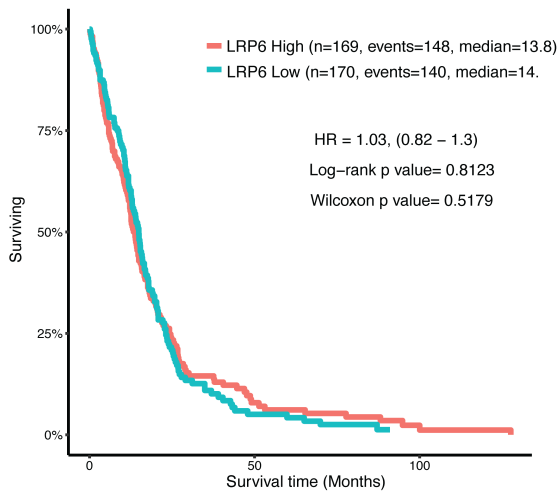

**D** RNA-Seq-LRP6  
Histology: GBM; Subtype: All; Cutoff: median

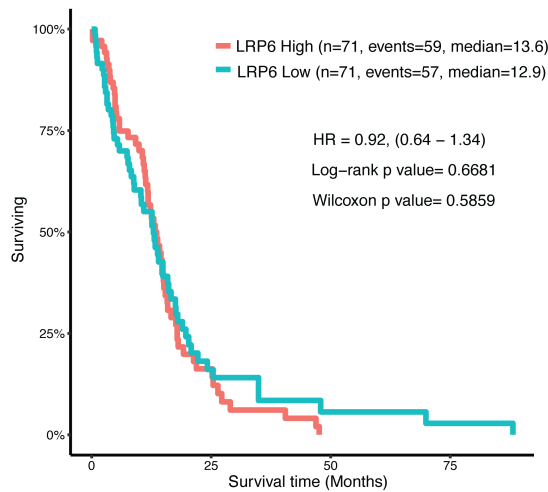

**E** CGGA-BGN  
Histology: All; Subtype: All; Cutoff: median

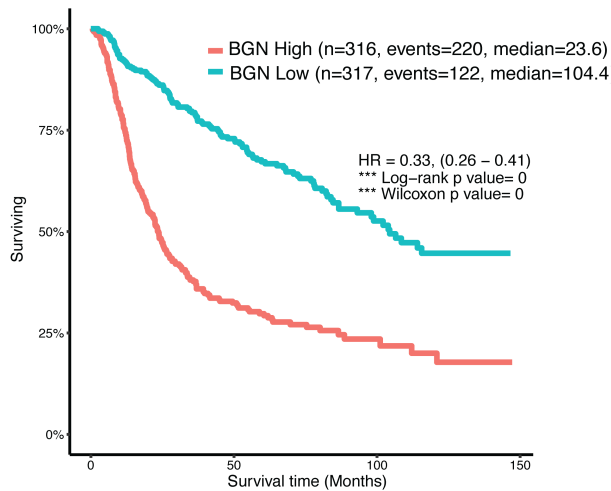

**F** CGGA-LRP6  
Histology: All; Subtype: All; Cutoff: median

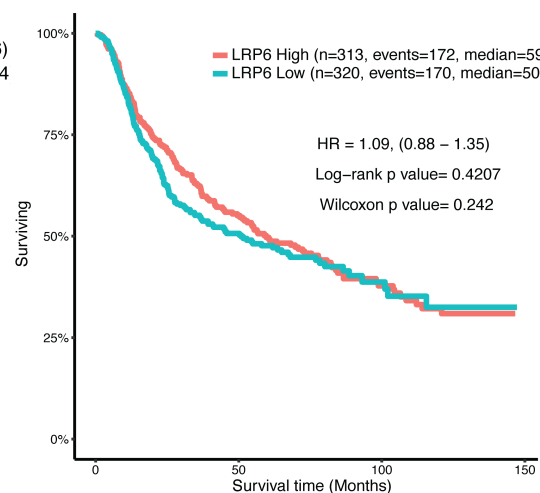

Supplement: Supplementary file 1 [file 40570645]
